# Supplementary material for: Cold acclimation induces life stage-specific responses in the cardiac proteome of western painted turtles ( Chrysemys picta bellii ): implications for anoxia tolerance
Source: Oxford University Press journal article supplement (doi:10.1242/jeb.242387), 2021-07-05
Supplement: jeb242387supp.pdf [file jeb242387supp.pdf]

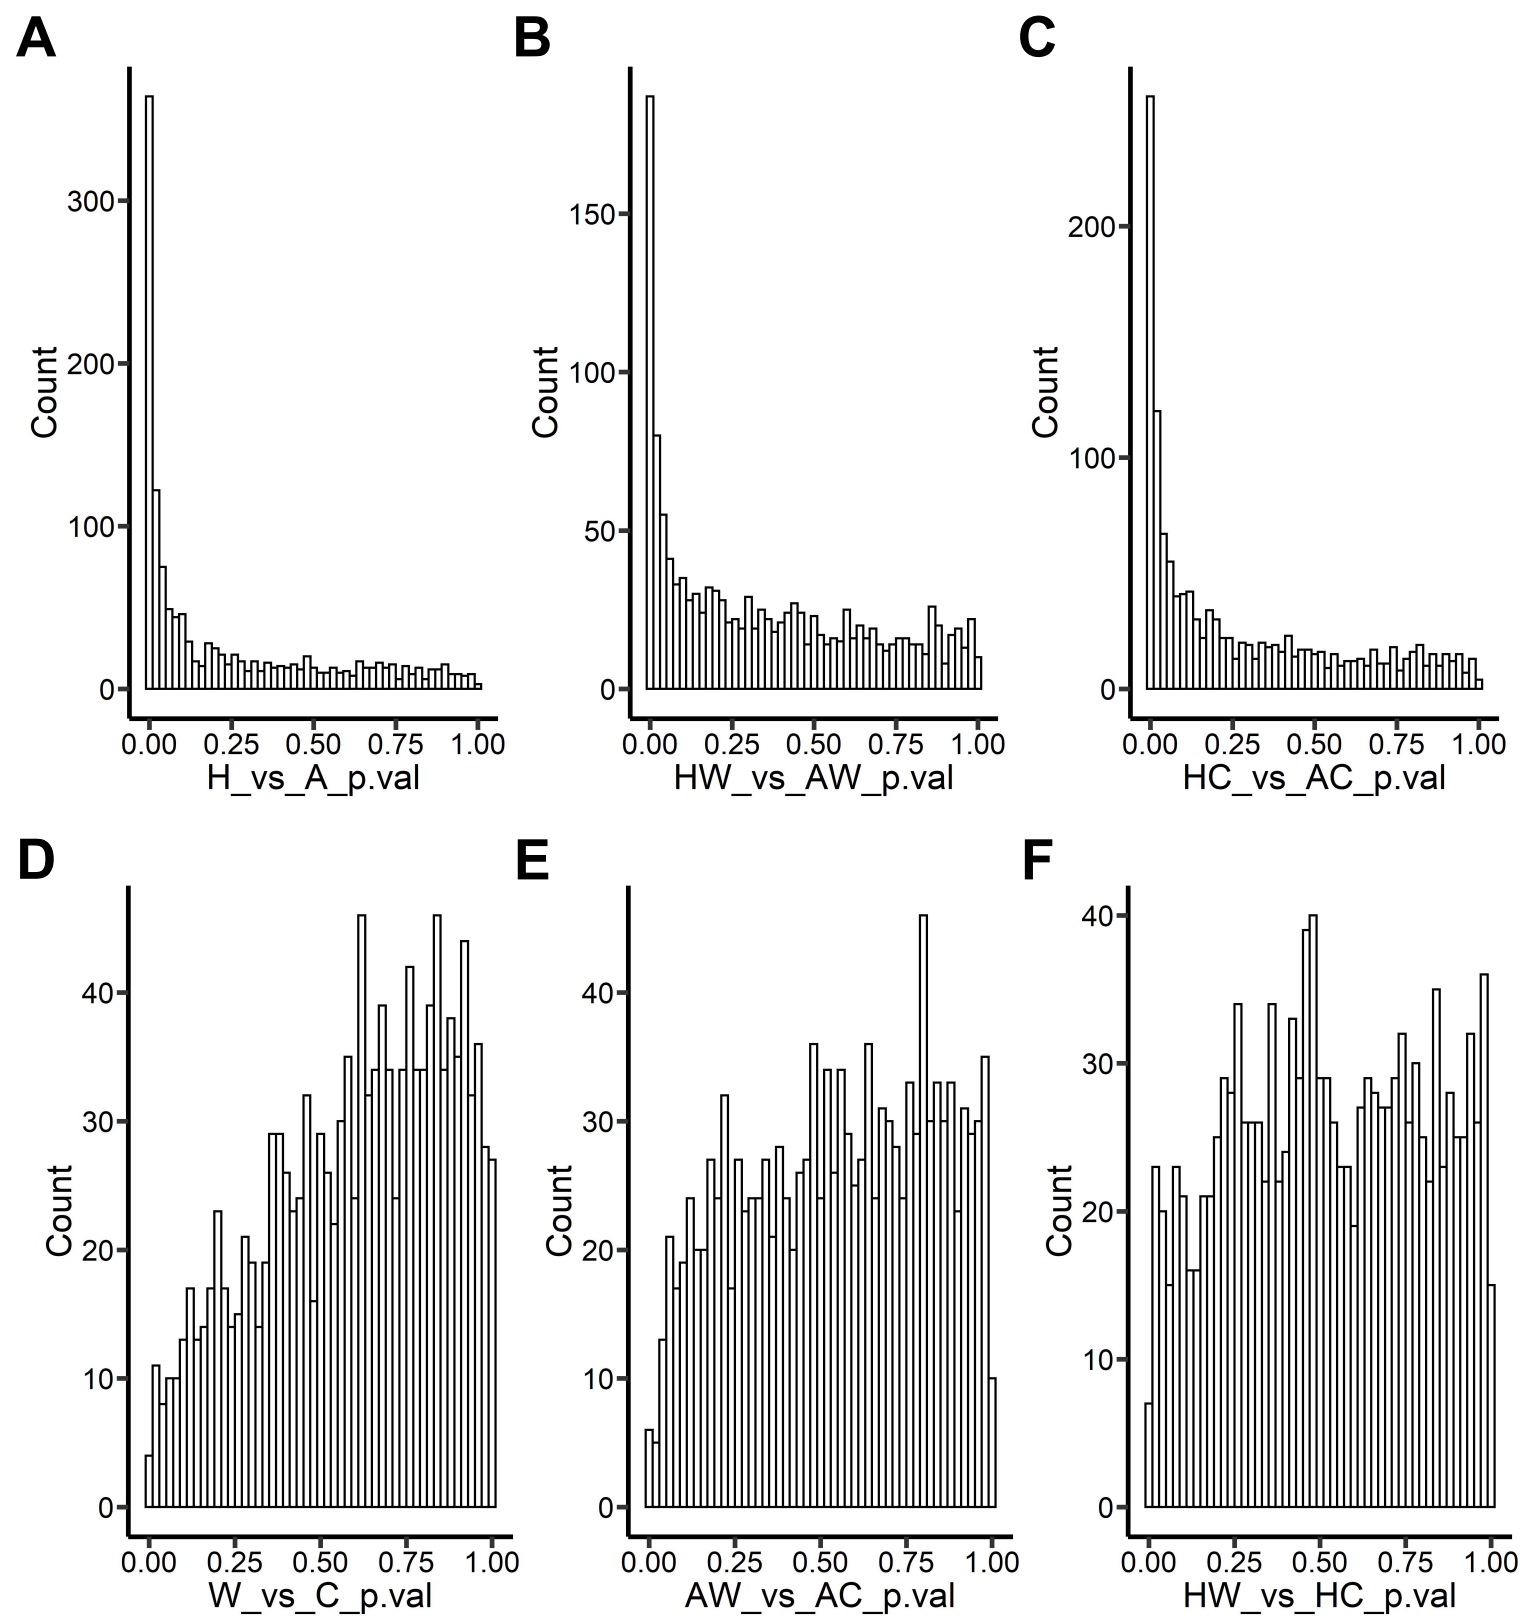

**Fig. S1.** Histograms of p-values resulting from pairwise comparisons of the abundances of 1316 proteins in the painted turtle cardiac proteome. The top panel shows results from the differential expression analysis for the main effect of developmental *stage* (A) and its interaction with *temperature* in warm-acclimated turtles (B) and cold-acclimated turtles (C). The bottom panel shows results for the main effect of *temperature* (D) and its interaction with developmental *stage* in adult (E) and hatchling (F) turtles. The strong peak and left-skewed histograms indicate that a non-negligible proportion of true positives exist in the dataset, whereas the uniformly distributed p-values suggest no true effects (Pascovici et al. 2016). These results were used to define differentially abundant proteins for *stage* effects, and to reject further consideration of discrete *temperature* effects.

**Supplementary Materials and Methods 1.** Setting specifications for LC/MS/MS provided by SPARC BioCenter Molecular Analysis (The Hospital for Sick Children, Toronto, ON).

Orbitrap Fusion Lumos Method Summary

Creator: FUSION-LUMOS\Thermo Scientific

Last Modified: 5/30/2019 3:27:40 PM by FUSION-LUMOS\Thermo Scientific

Global Settings

Use Ion Source Settings from Tune = False  
Method Duration (min)= 180  
Ion Source Type = NSI  
Spray Voltage: Positive Ion (V) = 1900  
Spray Voltage: Negative Ion (V) = 600  
Sweep Gas (Arb) = 0  
Ion Transfer Tube Temp (C) = 275  
APPI Lamp = Not in use  
Pressure Mode = Standard  
Default Charge State = 2  
Advanced Precursor Determination = False

Experiment 1

Start Time (min) = 0  
End Time (min) = 180  
Cycle Time (sec) = 3

*Scan MasterScan*

MSn Level = 1  
Use Wide Quad Isolation = False  
Detector Type = Orbitrap  
Orbitrap Resolution = 120K  
Mass Range = Normal  
Scan Range (m/z) = 550-1800  
Maximum Injection Time (ms) = 50  
AGC Target = 400000  
Microscans = 1  
RF Lens (%) = 30  
Use ETD Internal Calibration = False  
DataType = Profile  
Polarity = Positive

Source Fragmentation = False  
Scan Description =

*Filter MIPS*

MIPS Mode = Peptide

*Filter ChargeState*

Include undetermined charge states = False  
Include charge state(s) = 2-7  
Include charge states 25 and higher = False

*Filter DynamicExclusion*

Exclude after n times = 1  
Exclusion duration (s) = 25  
Mass Tolerance = ppm  
Mass tolerance low = 10  
Mass tolerance high = 10  
Exclude isotopes = True  
Perform dependent scan on single charge state per precursor only = False

*Filter IntensityThreshold*

Intensity Filter Type = IntensityThreshold  
Maximum Intensity = 1E+20  
Minimum Intensity = 20000  
Relative Intensity Threshold = 0

*Data Dependent Properties*

Data Dependent Mode = Cycle Time

Scan Event 1

*Scan ddMSnScan*

MSn Level = 2  
Isolation Mode = Quadrupole  
Isolation Offset = Off  
Isolation Window = 0.7  
Reported Mass = Offset Mass  
Multi-notch Isolation = False  
Scan Range Mode = Auto Normal  
FirstMass = 110  
Scan Priority = 1  
ActivationType = HCD  
Is Stepped Collision Energy On = False  
Stepped Collision Energy (%) = 5  
Collision Energy (%) = 35

Detector Type = Orbitrap  
Orbitrap Resolution = 15K  
Maximum Injection Time (ms) = 22  
AGC Target = 50000  
Inject ions for all available parallelizable time = False  
Microscans = 1  
Use ETD Internal Calibration = False  
DataType = Centroid  
Polarity = Positive  
Source Fragmentation = False  
Scan Description =

Sample pickup:  
Volume [l] : 5.00  
Flow [l / min] : 40.00

Sample loading:  
Volume [l] : 12.00  
Flow [l / min] : (unspecified)  
Max. pressure [Bar] : 900.00

Gradient:

| Time [mm:ss] | Duration [mm:ss] | Flow [nl/min] | Mixture [%B] |
|--------------|------------------|---------------|--------------|
| 00:00        | 00:00            | 250           | 2            |
| 68:00        | 68:00            | 250           | 20           |
| 170:00       | 102:00           | 250           | 38           |
| 172:00       | 02:00            | 250           | 100          |
| 180:00       | 08:00            | 250           | 100          |

Pre-column equilibration:  
Volume [l] : 10.00  
Flow [l / min] : (unspecified)  
Max. pressure [Bar] : 800.00

Analytical column equilibration:  
Volume [l] : 3.00  
Flow [l / min] : (unspecified)  
Max. pressure [Bar] : 900.00

Autosampler wash:  
Flush volume [l] : 100.00

**Table S1.** The cardiac proteome of *C. picta bellii*.

The cardiac proteome was described by a total of 1316 high-quality non-redundant protein identifications. The full list of proteins is provided in 3 ways:

1. Ranked by mean abundance across all 15 individual samples (Columns B-D)
2. Ranked by mean abundance in adult turtles only (Columns F-H)
3. Ranked by mean abundance in hatchling turtles only (Columns J-L)

[Click here to download Table S1](#)

**Table S2.** Differentially abundant proteins for the hatchling and adult painted turtle cardiac proteome. The data is organized into:

1. Main effect – stage: Complete list of differentially abundant proteins significant for the main effect stage
2. Interaction - stage × temperature (warm): Complete list of differentially abundant proteins between warm-acclimated adult and hatchling turtles
3. Interaction - stage × temp (cold): Complete list of differentially abundant proteins between cold-acclimated adult and hatchling turtles

[Click here to download Table S2](#)

**Table S3.** GO term enrichment represented by differentially abundant (DA) proteins in the turtle cardiac proteome. The data is organized into:

1. Biological Process: Complete list of enriched GO terms for Biological Process, for up regulated (top) and down regulated (bottom) proteins in adult relative to hatchling turtle hearts
2. Cellular Component: Complete list of enriched GO terms for Cellular Component, for up regulated (top) and down regulated (bottom) proteins in adult relative to hatchling turtle hearts
3. Molecular Function: Complete list of enriched GO terms for Molecular Function, for up regulated (top) and down regulated (bottom) proteins in adult relative to hatchling turtle hearts

[Click here to download Table S3](#)
